# Supplementary material
Source: MDPI journal article supplement (https://www.mdpi.com/2075-1702/11/3/332)
Supplement: s1 [file s1]

## **Supplementary Materials**

Boyu Wei<sup>1</sup>, Jie Zhang<sup>1</sup>, Ning Kong<sup>1\*</sup>, Shuai Ma<sup>1</sup>, Bo Wang<sup>2</sup>, Runqi Han<sup>2</sup>

1 School of Mechanical Engineering, University of Science and Technology Beijing,  
Beijing, 100083, China;

2 Beijing Institute of Spacecraft System Engineering, Beijing, 100094, China;

1. Design requirements for electromagnetic docking device

Table S1 Design requirements for electromagnetic docking device

| Parameter             | Requirement                                      |
|-----------------------|--------------------------------------------------|
| Enveloping Space      | less than $\Phi 150\text{mm} \times 30\text{mm}$ |
| Weight                | less than 3kg                                    |
| Power                 | less than 120W                                   |
| Electromagnetic Force | greater than 0.12N when the distance is 300mm    |

2. Design of mandrel diameter of the I-shaped iron core

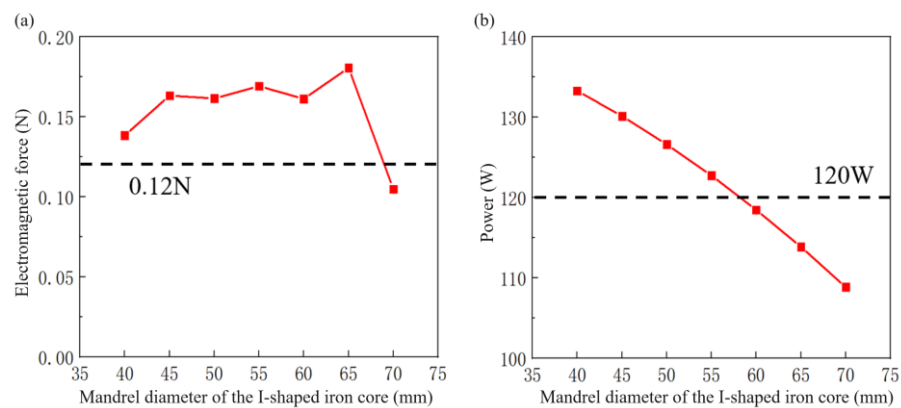

Figure S1 Variation curve of electromagnetic force (a) and power (b) with the mandrel diameter of the I-shaped iron core.

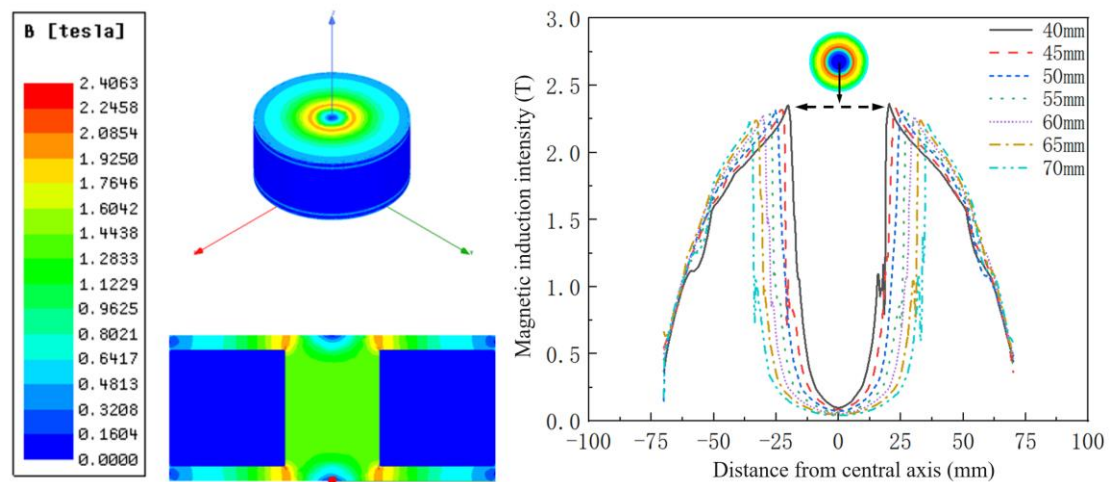

Figure S2 Surface magnetic induction intensity of electromagnetic docking device.

### 3. Design of the through-hole diameter of I-shaped iron core

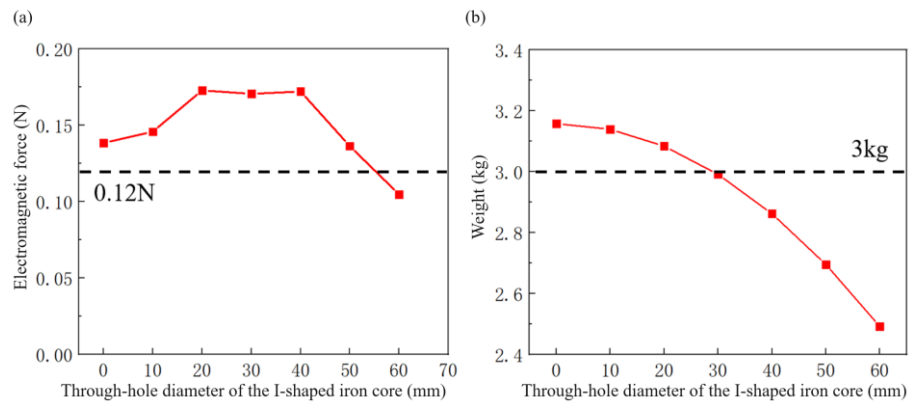

Figure S3 Variation curve of electromagnetic force (a) and weight (b) with the through-hole diameter of the I-shaped iron core.

### 4. Structural parameters of electromagnetic docking device

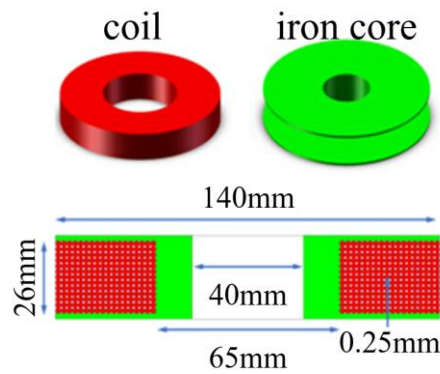

Figure S4 Structural parameters of electromagnetic docking device. The designed electromagnetic docking mechanism requires 3900 ampere turns, 113.8 W power, and a 2.86 kg weight.
